# Supplementary material
Source: PubMed Central journal article supplement (PMC8478665)
Supplement: mmc1.pdf [file mmc1.pdf]

# THE LANCET

## Microbe

### Supplementary appendix 1

This translation in Portuguese was submitted by the authors and we reproduce it as supplied. It has not been peer reviewed. The Lancet's editorial processes have only been applied to the original in English, which should serve as reference for this manuscript.

Supplement to: Souza WM, Amorim MR, Sesti-Costa R, et al. Neutralisation of SARS-CoV-2 lineage P.1 by antibodies elicited through natural SARS-CoV-2 infection or vaccination with an inactivated SARS-CoV-2 vaccine: an immunological study. *Lancet Microbe* 2021; published online July 8. [https://doi.org/10.1016/S2666-5247\(21\)00129-4](https://doi.org/10.1016/S2666-5247(21)00129-4).

Esta tradução em português foi submetida pelos autores e nós não fizemos quaisquer alterações. Esta versão não foi revista por pares. O processo editorial do The Lancet só foi aplicado à versão original em inglês, que deve servir como referência para este artigo.

# Níveis de neutralização da linhagem P.1 de SARS-CoV-2 por anticorpos produzidos após infecção natural e vacinação: um estudo imunológico

## Resumo

**Introdução:** Uma nova linhagem de SARS-CoV-2, chamada P.1 (20J/501Y.V3), foi recentemente detectada no Brasil. Dentre as mutações presentes na linhagem P.1, estão incluídas mudanças de aminoácidos no domínio de ligação ao receptor da proteína da espícula que são relatadas em outras variantes de preocupação, como a B.1.1.7 e a B.1.351. Esse estudo teve como objetivo investigar se isolados selvagens do novo variante P.1 podem escapar de anticorpos neutralizantes gerados por uma resposta imune policlonal.

**Métodos:** Nós conduzimos um estudo imunológico para determinar o efeito neutralizante de anticorpos contra isolados da linhagem P.1 e B de SARS-CoV-2, usando plasma de pacientes previamente infectados ou vacinados contra SARS-CoV-2. Dois espécimes da linhagem P.1 foram isolados de lavado de nasofaringe e aspirado brônquico-alveolar de pacientes de Manaus, Brasil. A neutralização do vírus P.1 foi mensurada após incubação com plasma de 21 doadores de sangue na fase de convalescência de COVID-19 e um total de 53 pessoas que receberam a vacina quimicamente inativada CoronaVac. Foram incluídas amostras de plasma de 18 indivíduos que receberam uma única dose e 38 indivíduos que receberam as duas doses da vacina, todos coletados entre 17 e 38 dias após imunização. Também foram incluídas amostras de plasma de 15 indivíduos que receberam duas doses da vacina entre 134-260 dias antes da coleta. Os resultados de neutralização para P.1 foram comparados com os resultados obtidos para um isolado da linhagem B, que circulou no começo da pandemia no Brasil, analisando a mediana do título neutralizante viral (VNT<sub>50</sub>- definido como o valor de diluição da amostra que conferiu 50% de proteção contra a presença de efeito citopático).

**Resultados:** O ensaio de VNT<sub>50</sub> revelou que o plasma de pacientes convalescentes da COVID-19 possui uma capacidade neutralizante 8,6 vezes menor para os isolados P.1 (mediana de VNT<sub>50</sub> igual a 30 [IQR <20-45] para P.1/28 e 30 [<20-40] para P.1/30) do que para a linhagem B (260 [160-400]), com um modelo binomial mostrando redução significativa entre as linhagens P.1 e B com  $p < 0,0001$ . O plasma de indivíduos coletados 20-23 dias após uma dose (VNT<sub>50</sub> abaixo do limite de detecção [<20] para a maioria dos plasmas) ou 17-38 dias após duas doses da CoronaVac (VNT<sub>50</sub> de 24 [IQR <20-25 para P.1/28 e P.1/30], assim como o plasma coletado 134-260 dias após imunização (VNT<sub>50</sub> abaixo do limite de detecção [<20] para todas as amostras), falharam em neutralizar eficientemente os isolados da linhagem P.1. A mediana do VNT<sub>50</sub> contra a linhagem B foi 20 (IQR 20-30) após 20-23 dias da primeira dose da CoronaVac; 75 (<20-263) após 17-38 dias da segunda dose; e 20 (<20-30) após 134-260 dias da segunda dose. A capacidade neutralizante do plasma coletado 17-34 dias após a segunda dose da vacina contra os isolados da linhagem P.1 foi significativamente reduzida ( $p=0,0051$  para P.1/28 e  $p=0,0336$  para P.1/30) comparado com a capacidade de neutralizar a linhagem B. Todos os dados foram confirmados pelo método de PRNT<sub>50</sub> (teste de neutralização por redução da formação de placas de lise).

**Interpretação:** Esses dados indicam que a linhagem P.1 pode escapar da neutralização por parte dos anticorpos gerados em resposta a um estímulo policlonal induzido por variantes de SARS-CoV-2 que circulavam no início da pandemia. Desse modo, a vigilância genômica de SARS-CoV-2, e a realização combinada de ensaios de neutralização podem ajudar a guiar os programas nacionais de vacinação.

**Financiamento:** Fundação de Apoio à Pesquisa do Estado de São Paulo, Ministério de Ciência e Tecnologia do Brasil, Financiadora de Estudos e Projeto, Conselho Nacional de Desenvolvimento Científico e Tecnológico, Fundo de apoio ao ensino, pesquisa e extensão da Unicamp, Medical Research Council, National Council for Scientific and Technological Development, National Institutes of Health.
