# Supplementary material
Source: PubMed Central journal article supplement (PMC8478665)
Supplement: mmc2.pdf [file mmc2.pdf]

# THE LANCET Microbe

## Supplementary appendix 2

This appendix formed part of the original submission and has been peer reviewed. We post it as supplied by the authors.

Supplement to: Souza WM, Amorim MR, Sesti-Costa R, et al. Neutralisation of SARS-CoV-2 lineage P.1 by antibodies elicited through natural SARS-CoV-2 infection or vaccination with an inactivated SARS-CoV-2 vaccine: an immunological study. *Lancet Microbe* 2021; published online July 8. [https://doi.org/10.1016/S2666-5247\(21\)00129-4](https://doi.org/10.1016/S2666-5247(21)00129-4).

## Supplementary appendix

### Supplementary Information: Materials and Methods

To investigate whether convalescent individuals have reduced plasma virus neutralization titers against isolates of SARS-CoV-2 lineage P.1 compared to those against lineage B viruses. First, we calculated the paired differences in the neutralization titers between lineages P.1/28 and B, and those between P.1/30 and B. Subsequently we dichotomized the paired differences into “greater than 0” and “less or equal to 0” to produce count tables. The count table is the same for both paired differences, so we only need to conduct one hypothesis test. For the hypothesis test, we assumed that each sample was an independent draw from a much larger population, and every sample had the same probability of  $p$  of having a paired difference  $> 0$ . Consequently, we used a binomial distribution to model the count of “difference  $> 0$ ”. As an indication of statistical support, we calculated the p-value, which is the probability of observing at least as many “differences  $> 0$ ” out of the total sample size, given that there is no difference in proportions/probabilities between “differences  $> 0$ ” and “differences  $\leq 0$ ”. We repeated the above procedure for the plasma from vaccinated individuals. The count tables produced is presented in Table S5. A Bonferroni multiple test correction was applied. In addition, we performed the Pearson’s correlation between the two paired differences in the convalescent samples. All these analyses were performed using the R studio version 1.3.1073 (<https://rstudio.com>)

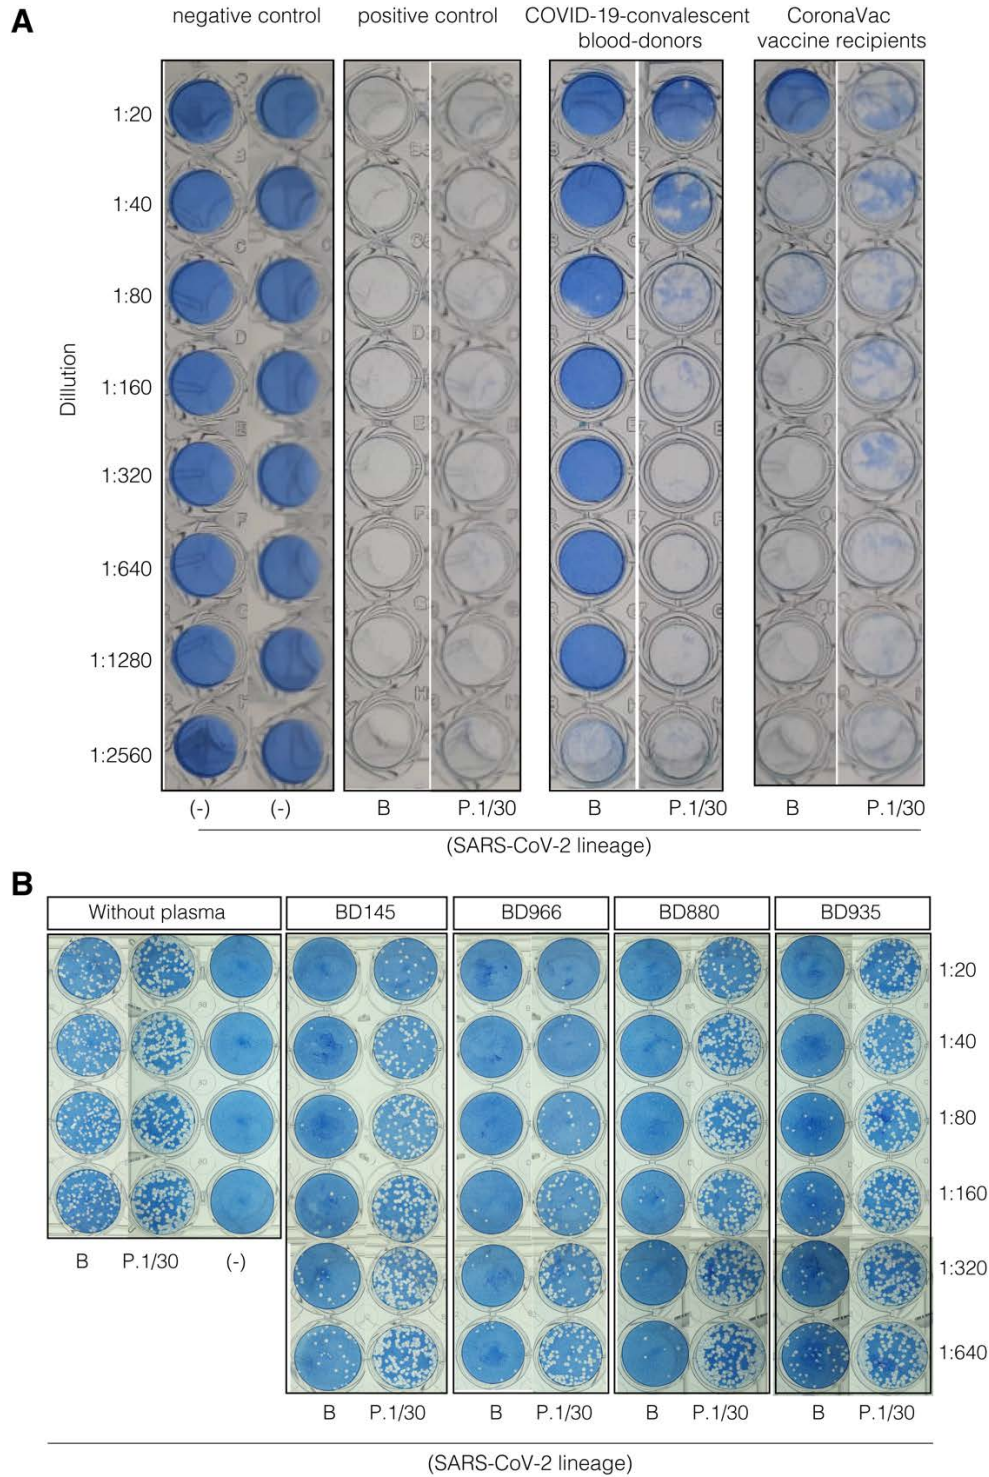

**Supplementary Figure 1. Representative image of neutralizing antibody assays used in this study. (A)** Virus neutralization test of plasma from COVID-19-convalescent blood-donors and CoronaVac vaccine recipients against isolates of P.1 and B lineages. **(B)** Plaque reduction neutralization test of plasma from COVID-19-convalescent blood-donors against isolates of P.1 and B lineages.

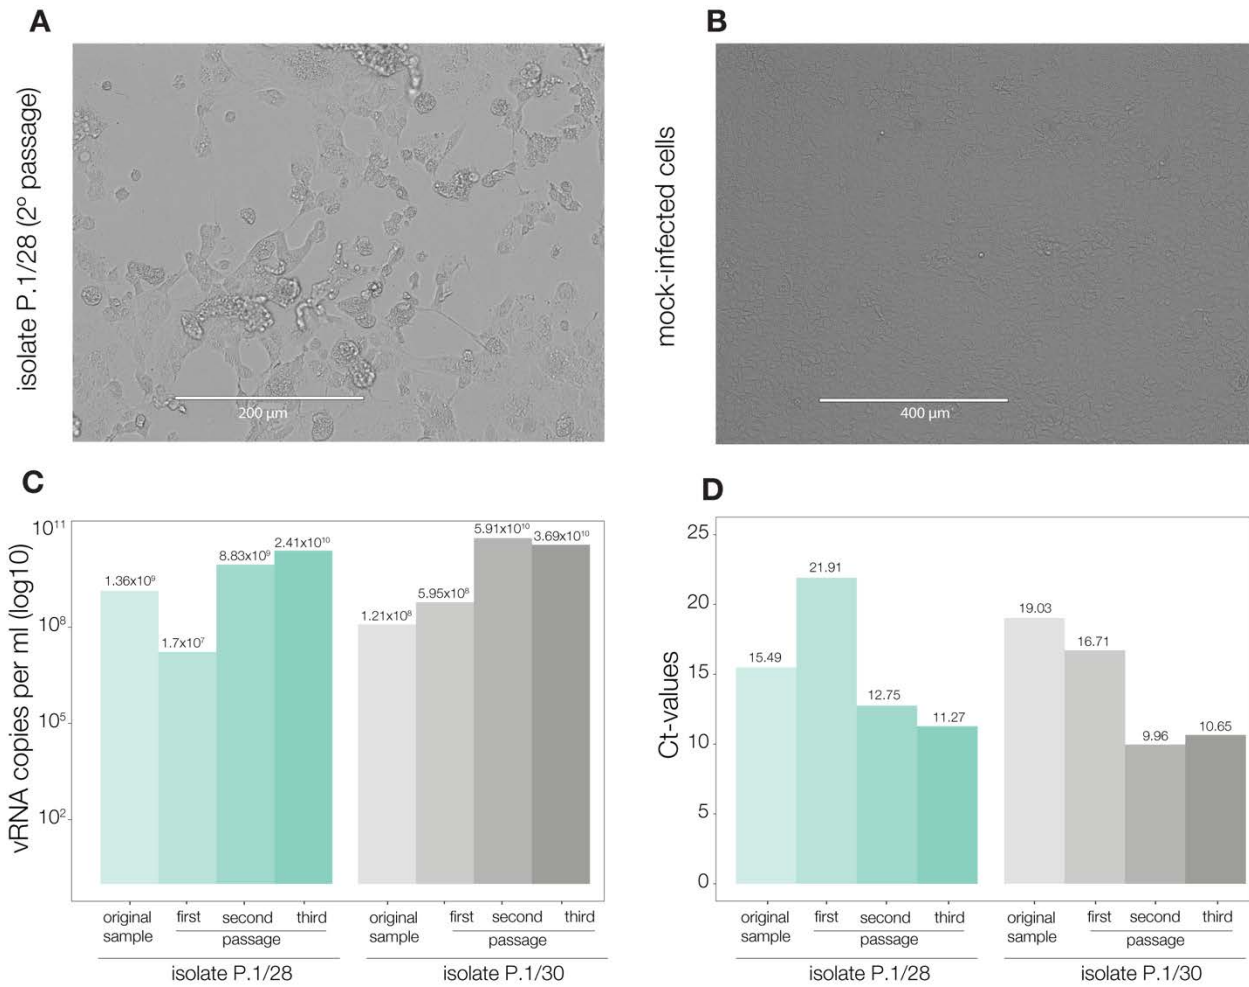

**Supplementary Figure 2. SARS-CoV-2 lineage P.1 (P.1/28 and P.1/30) isolated from nasopharyngeal samples of COVID-19 patients from Manaus city, Amazonas, Brazil.** Isolation of P.1 lineage of SARS-CoV-2 was performed in Vero cells in a Biosafety Level 3 Facility of the Emerging Viruses Laboratory at the University of Campinas, and a typical cytopathic effect was observed after 72 hours post-infection in inoculated cells (A) in comparison with uninfected cells (B). The isolation was also confirmed by RT-qPCR for the envelope gene after RNA extraction of the cell supernatant, where it is possible to observe an increase in viral load (C) and a decrease in the Ct-value (D) after the sustained passages in Vero cells. Images were obtained in an EVOS inverted microscope kindly provided by Thermo Fisher Scientific. Images showed were representative of P.1/28 isolate.

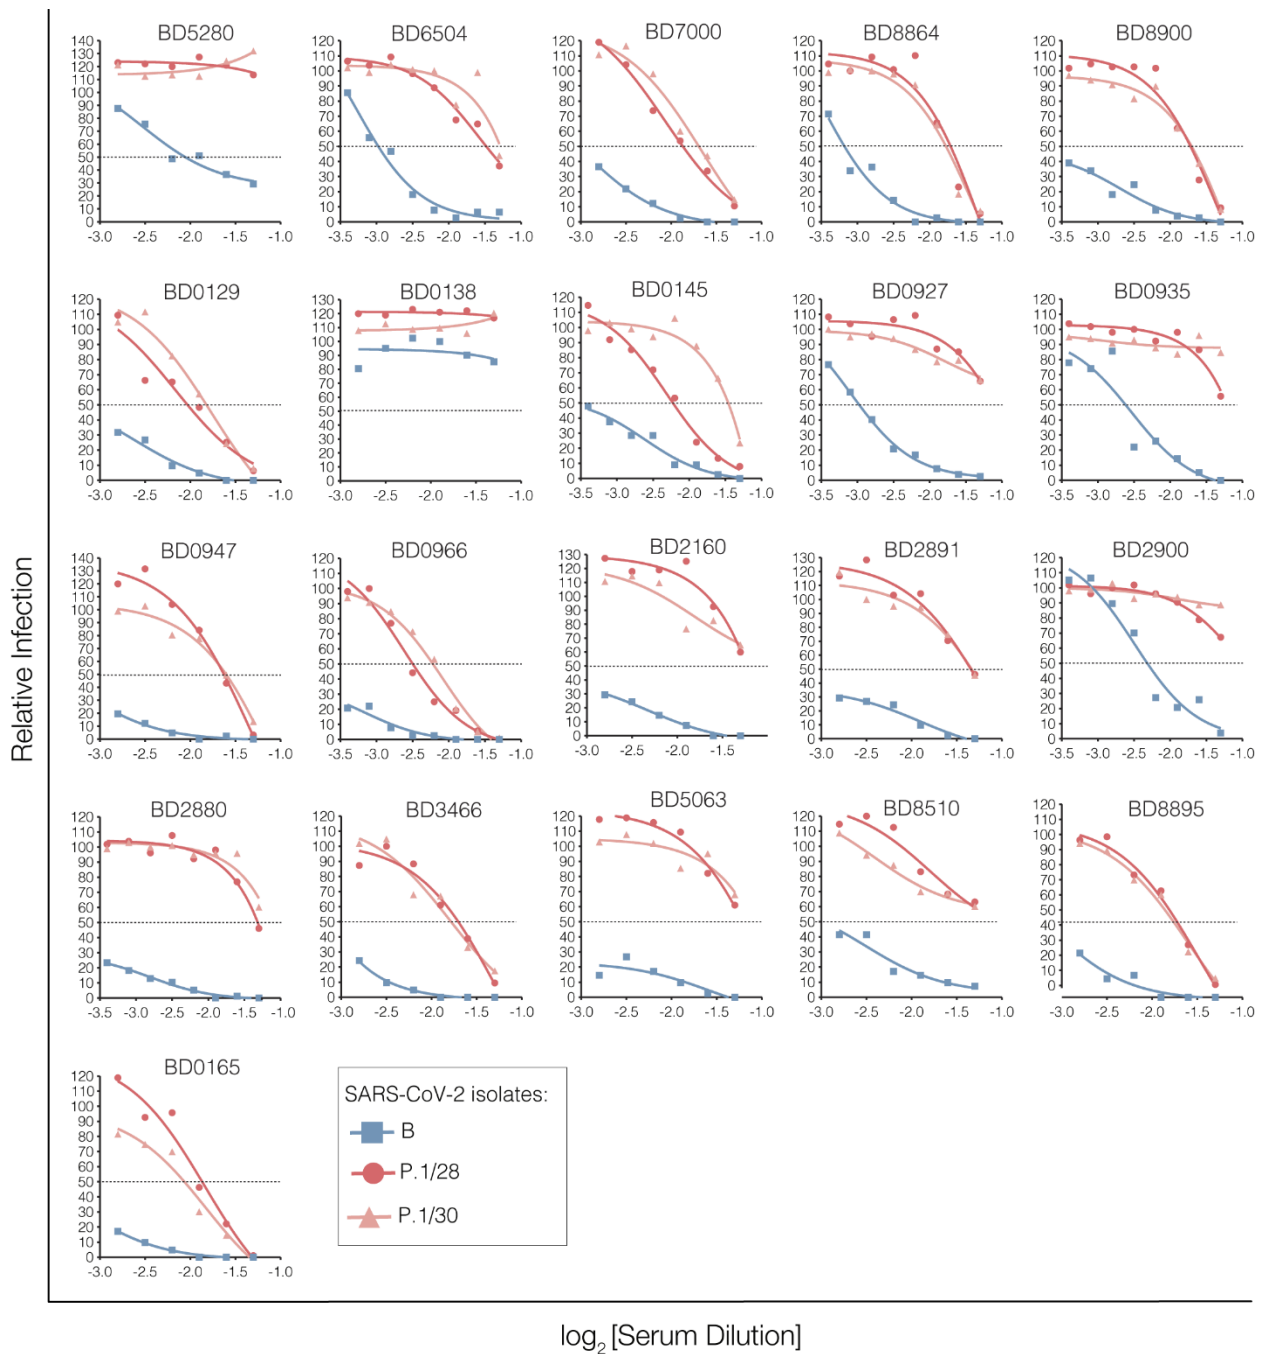

**Supplementary Figure 3. PRNT<sub>50</sub> of each plasma of COVID-19-convalescent blood-donors (n=21).** The PRNT<sub>50</sub> represents the dilution that showed 50% reduction in plaque formation in comparison with a control without plasma after linear regression analysis. The symbols represent the average of plasmas samples and error bars represent the standard errors.

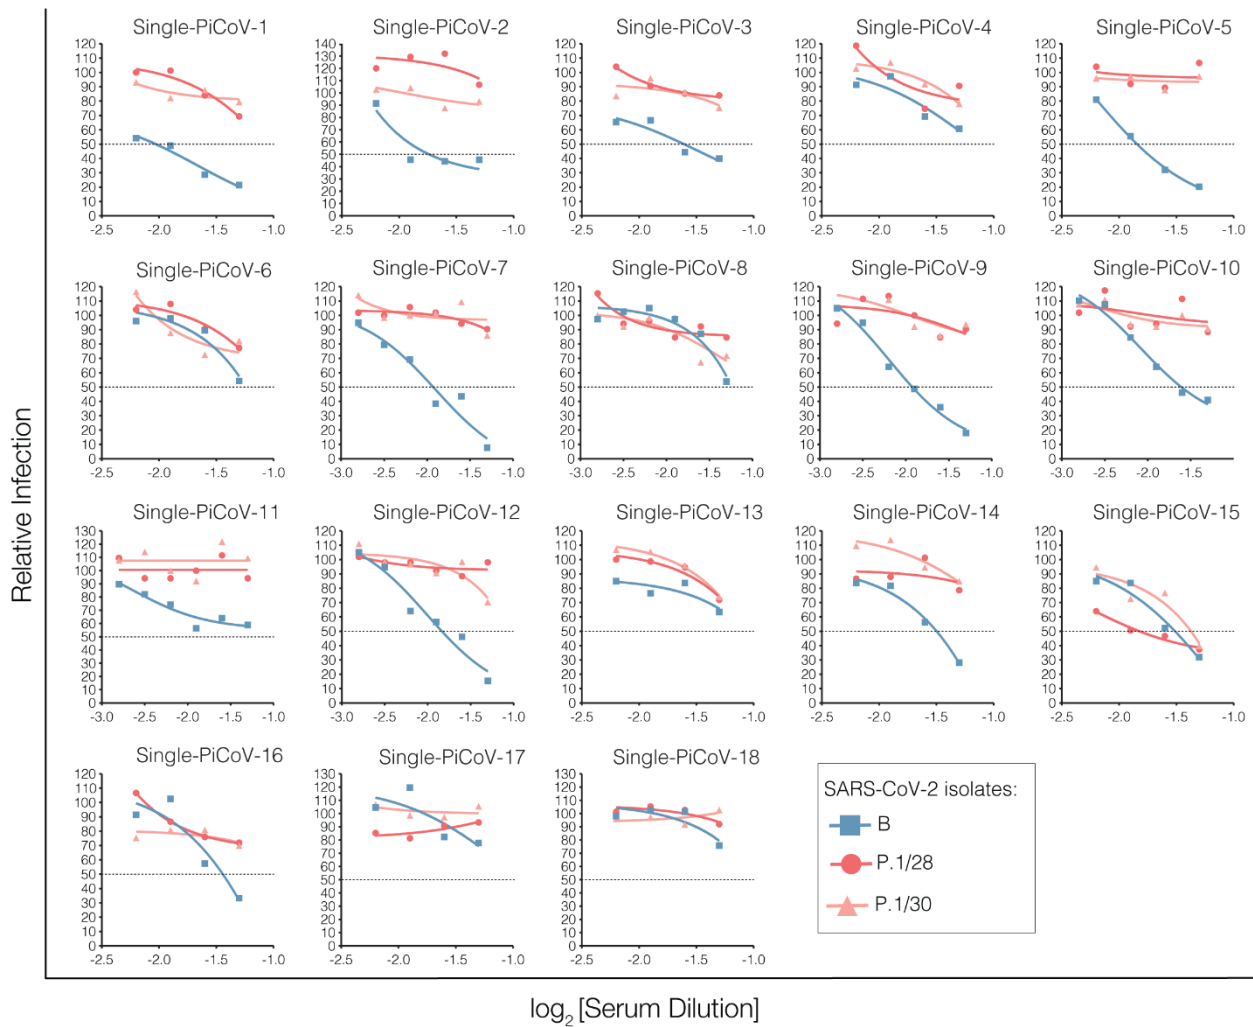

**Supplementary Figure 4. PRNT<sub>50</sub> of each plasma of single-dose CoronaVac recipients (n=18).** The PRNT<sub>50</sub> represents the dilution that showed 50% reduction in plaque formation in comparison with a control without plasma after linear regression analysis. The symbols represent the average of plasmas samples and error bars represent the standard errors.

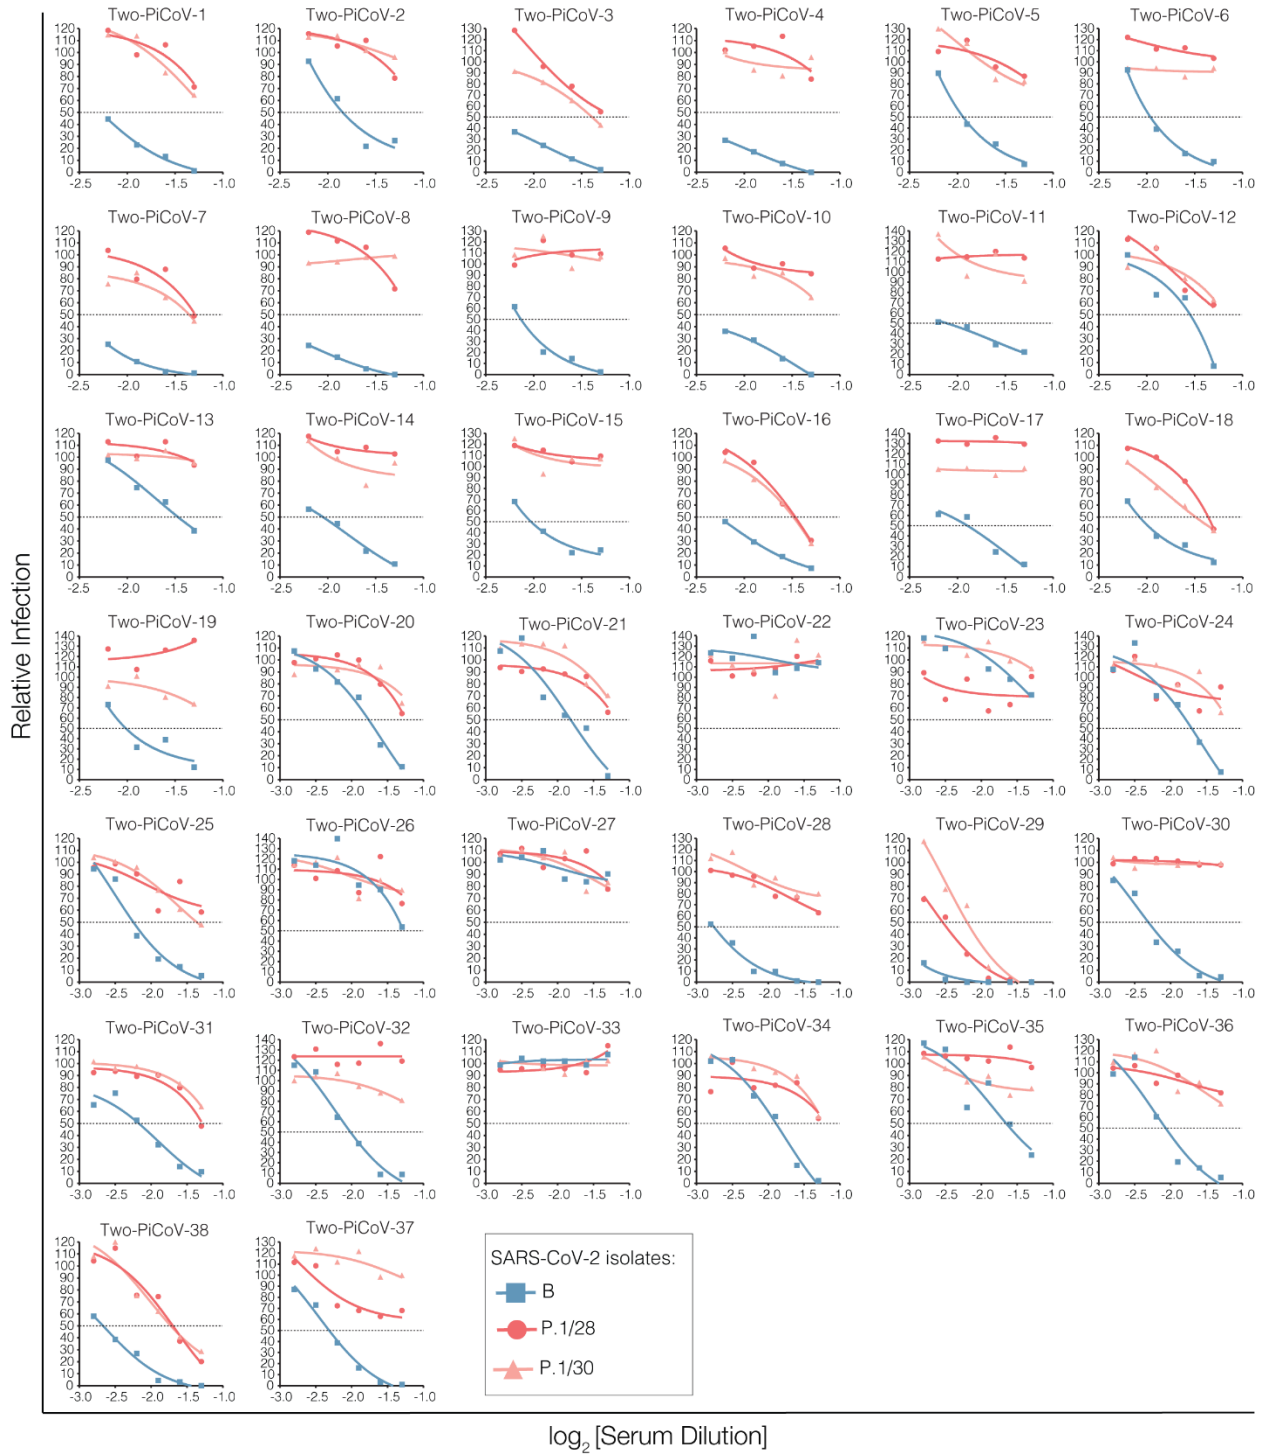

**Supplementary Figure 5. PRNT<sub>50</sub> of each plasma of two-dose CoronaVac recipients collected ~3 weeks after vaccination (n=38).** The plasma was collected between 17 to 38 days (median = 21 days) after second dose. The PRNT<sub>50</sub> represents the dilution that showed 50% reduction in plaque formation in comparison with a control without plasma after linear regression analysis. The symbols represent the average of plasmas samples and error bars represent the standard errors.

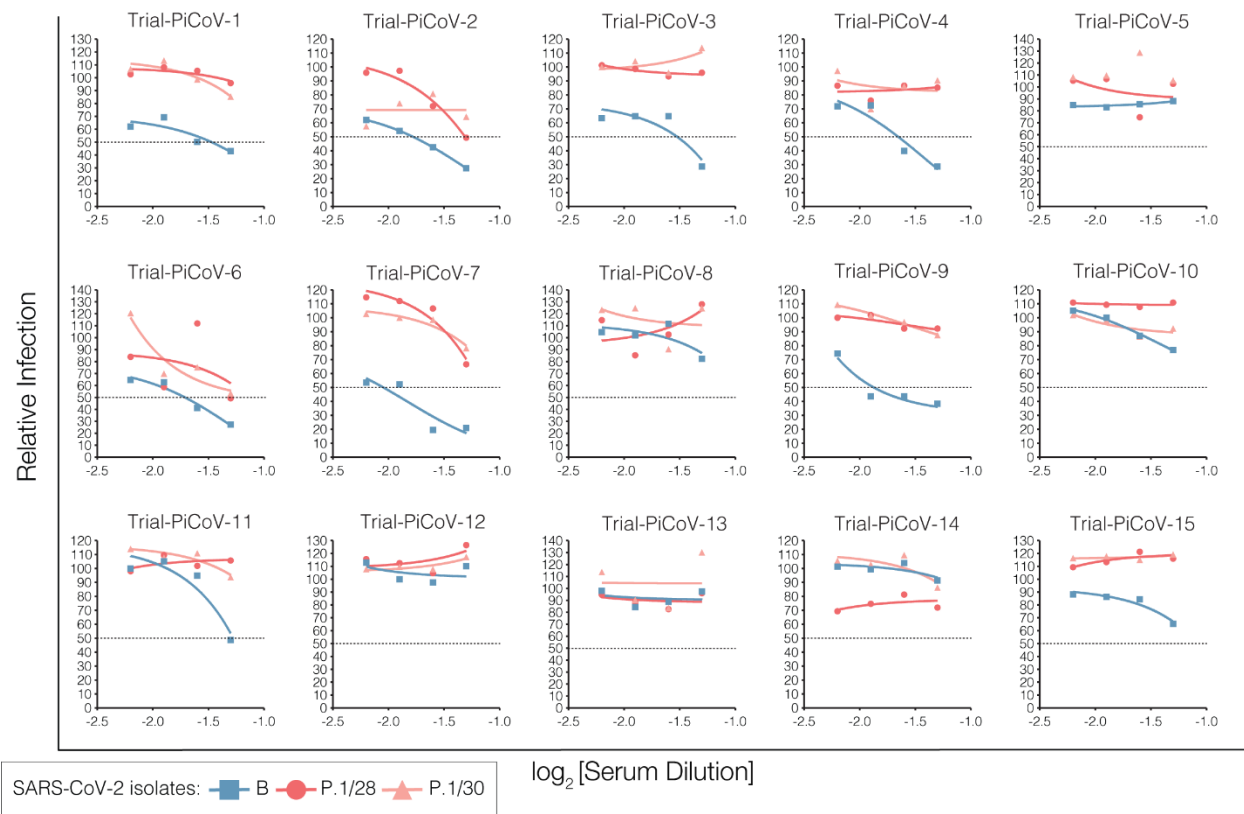

**Supplementary Figure 6. PRNT<sub>50</sub> of each plasma of two-dose CoronaVac recipients collected ~5 months after vaccination (n=38).** The plasma was collected between 134 to 260 days (median = 158 days) after second dose. The PRNT<sub>50</sub> represents the dilution that showed 50% reduction in plaque formation in comparison with a control without plasma after linear regression analysis. The symbols represent the average of plasmas samples and error bars represent the standard errors.



**Table S1.** Information and VNT<sub>50</sub> results of COVID-19-convalescent blood-donors.

| ID     | age | sex | Diagnosis | Symptoms durations (days) | Time between symptoms and collection (days) | Hospitalization | Plasma collection | IgM   | IgG  | P.1/28 <sup>1</sup> | P.1/30 <sup>1</sup> | B <sup>1</sup> |
|--------|-----|-----|-----------|---------------------------|---------------------------------------------|-----------------|-------------------|-------|------|---------------------|---------------------|----------------|
| BD5280 | 31  | F   | RT-qPCR   | 14                        | 52                                          | no              | 21/05/20          | 0.88  | 2.82 | <20                 | <20                 | <20            |
| BD6504 | 48  | M   | RT-qPCR   | 11                        | 42                                          | no              | 01/06/20          | 7.92  | 3.54 | 30                  | <20                 | 220            |
| BD7000 | 33  | F   | RT-qPCR   | 19                        | 44                                          | no              | 11/06/20          | 5.48  | 8.15 | 60                  | 35                  | 560            |
| BD8864 | 31  | F   | RT-qPCR   | 22                        | 66                                          | no              | 26/06/20          | 2.11  | 4.66 | 45                  | 35                  | 440            |
| BD8900 | 43  | M   | RT-qPCR   | 0*                        | 71                                          | no              | 07/07/20          | 20.42 | 6.02 | <20                 | 50                  | 320            |
| BD0129 | 34  | M   | serology  | 4                         | 69                                          | no              | 08/07/20          | 0.74  | 5.73 | 25                  | 60                  | 320            |
| BD0138 | 32  | F   | RT-qPCR   | 16                        | 60                                          | no              | 09/07/20          | 2.48  | 0.01 | <20                 | <20                 | 320            |
| BD0145 | 58  | M   | serology  | 10                        | 102                                         | no              | 10/07/20          | 1.88  | 5.47 | 30                  | 95                  | 1040           |
| BD0927 | 44  | M   | RT-qPCR   | 2                         | 68                                          | no              | 24/07/20          | 16.34 | 6.31 | <20                 | 30                  | 400            |
| BD0935 | 28  | F   | serology  | 10                        | 56                                          | no              | 24/07/20          | 13.27 | 7.04 | <20                 | <20                 | 180            |
| BD0947 | 18  | M   | serology  | 3                         | 84                                          | no              | 21/07/20          | 3.64  | 7.14 | 55                  | 55                  | 260            |
| BD0966 | 29  | F   | RT-qPCR   | 13                        | 43                                          | yes             | 24/07/20          | 22.16 | 8.10 | 320                 | 120                 | 2560           |
| BD2160 | 34  | F   | RT-qPCR   | 9                         | 73                                          | no              | 30/07/20          | 9.23  | 6.07 | <20                 | 20                  | 120            |
| BD2891 | 57  | M   | serology  | 17                        | 10                                          | no              | 04/08/20          | 1.39  | 5.5  | 60                  | <20                 | 90             |
| BD2900 | 36  | F   | serology  | 0*                        | 28                                          | no              | 05/08/20          | 1.94  | 7.61 | <20                 | <20                 | 110            |
| BD2880 | 34  | M   | RT-qPCR   | 13                        | 45                                          | no              | 10/08/20          | 45.86 | 5.62 | <20                 | <20                 | 1600           |
| BD3466 | 43  | F   | serology  | 16                        | 68                                          | no              | 13/08/20          | 3.06  | 8.36 | 40                  | 35                  | 360            |
| BD5063 | 25  | F   | serology  | 34                        | 69                                          | yes             | 27/08/20          | 0.29  | 2.55 | 30                  | 20                  | 180            |
| BD8510 | 41  | M   | RT-qPCR   | 16                        | 65                                          | no              | 29/08/20          | 7.87  | 0.63 | <20                 | <20                 | 105            |
| BD8895 | 31  | F   | RT-PCR    | 4                         | 96                                          | no              | 03/07/20          | 3.05  | 2.01 | 35                  | 30                  | 160            |
| BD0165 | 34  | F   | serology  | 12                        | 31                                          | no              | 14/07/20          | 0.6   | 7.81 | 70                  | 40                  | 240            |

Legend: RT-qPCR, real-time quantitative polymerase chain reaction. \* asymptomatic cases. F, female. M, male. IgM, Immunoglobulin M. IgG, Immunoglobulin G. <sup>1</sup>VNT titer.

**Table S2.** Information and VNT<sub>50</sub> values from CoronaVac vaccinated individuals with single-dose and two-dose collected ~3 weeks after immunization.

| sample ID       |              | Age (years) | Sex | 1° dose of CoronaVac vaccine |                   |      |      |                     |                     | 2° dose of CoronaVac vaccine |              |                   |      |      |                     |                     |                |
|-----------------|--------------|-------------|-----|------------------------------|-------------------|------|------|---------------------|---------------------|------------------------------|--------------|-------------------|------|------|---------------------|---------------------|----------------|
| 1° dose         | 2° dose      |             |     | Immunization                 | Plasma collection | IgM  | IgG  | P.1/28 <sup>1</sup> | P.1/30 <sup>1</sup> | B <sup>1</sup>               | Immunization | Plasma collection | IgM  | IgG  | P.1/28 <sup>1</sup> | P.1/30 <sup>1</sup> | B <sup>1</sup> |
| Single-PiCoV-1  | Two-PiCoV-1  | 25          | M   | 20/01/21                     | 10/02/21          | 0.49 | 1.22 | <20                 | <20                 | 30                           | 10/02/21     | 02/03/21          | 0.92 | 8.2  | 90                  | 33                  | 130            |
| Single-PiCoV-2  | Two-PiCoV-2  | 25          | M   | 20/01/21                     | 10/02/21          | 0.07 | 0.55 | <20                 | <20                 | 30                           | 10/02/21     | 02/03/21          | 1.07 | 0.25 | <20                 | <20                 | <20            |
| Single-PiCoV-3  | Two-PiCoV-3  | 35          | F   | 20/01/21                     | 10/02/21          | 0.06 | 0.41 | <20                 | <20                 | 20                           | 10/02/21     | 02/03/21          | 0.43 | 2.35 | <20                 | 30                  | 180            |
| Single-PiCoV-4  | Two-PiCoV-4  | 29          | F   | 20/01/21                     | 10/02/21          | 0.02 | 0.57 | <20                 | <20                 | <20                          | 10/02/21     | 02/03/21          | 0.46 | 1.31 | <20                 | <20                 | 240            |
| Single-PiCoV-5  | Two-PiCoV-5  | 30          | F   | 20/01/21                     | 09/02/21          | 0.34 | 0.73 | <20                 | <20                 | 30                           | 10/02/21     | 03/03/21          | 0.41 | 3.9  | <20                 | <20                 | 40             |
| Single-PiCoV-6  | Two-PiCoV-6  | 36          | M   | 20/01/21                     | 10/02/21          | 0.09 | 0.09 | <20                 | <20                 | 20                           | 10/02/21     | 03/03/21          | 0.13 | 0.24 | <20                 | 20                  | <20            |
| Single-PiCoV-7  | Two-PiCoV-7  | 24          | F   | 18/01/21                     | 08/02/21          | 0.13 | 3.84 | <20                 | <20                 | 50                           | 09/02/21     | 01/03/21          | 1.94 | 3.14 | 20                  | 20                  | 680            |
| Single-PiCoV-8  | Two-PiCoV-8  | 27          | F   | 20/01/21                     | 10/02/21          | 0.21 | 1.23 | <20                 | <20                 | <20                          | 10/02/21     | 05/03/21          | 1.11 | 2.05 | <20                 | <20                 | 70             |
| Single-PiCoV-9  | Two-PiCoV-9  | 29          | F   | 20/01/21                     | 10/02/21          | 0.02 | 0.5  | 30                  | <20                 | 30                           | 10/02/21     | 02/03/21          | 0.61 | 0.5  | <20                 | <20                 | 35             |
| Single-PiCoV-10 | Two-PiCoV-10 | 29          | F   | 20/01/21                     | 10/02/21          | 0.58 | 1.31 | <20                 | <20                 | 20                           | 10/02/21     | 03/03/21          | 0.89 | 2.46 | <20                 | <20                 | 270            |
| Single-PiCoV-11 | Two-PiCoV-11 | 28          | F   | 20/01/21                     | 10/02/21          | 0.01 | 0.43 | <20                 | <20                 | <20                          | 10/02/21     | 02/03/21          | 0.54 | 0.34 | 45                  | 20                  | 80             |
| Single-PiCoV-12 | Two-PiCoV-12 | 37          | F   | 20/01/21                     | 10/02/21          | 0.19 | 0.76 | <20                 | <20                 | 20                           | 11/02/21     | 02/03/21          | 0.98 | 1.62 | 45                  | <20                 | 80             |
| Single-PiCoV-13 | Two-PiCoV-13 | 42          | M   | 20/01/21                     | 11/02/21          | 0.14 | 0.84 | <20                 | <20                 | 20                           | 10/02/21     | 03/03/21          | 0.52 | 0.47 | <20                 | 20                  | <20            |
| Single-PiCoV-14 | Two-PiCoV-14 | 26          | F   | 20/01/21                     | 10/02/21          | 0.29 | 0.14 | <20                 | <20                 | 50                           | 10/02/21     | 02/03/21          | 0.93 | 2.94 | 45                  | <20                 | 90             |
| Single-PiCoV-15 | Two-PiCoV-15 | 38          | M   | 20/01/21                     | 10/02/21          | 0.01 | 0.93 | <20                 | <20                 | 30                           | 10/02/21     | 05/03/21          | 3.37 | 0.4  | <20                 | <20                 | 20             |
| Single-PiCoV-16 | Two-PiCoV-16 | 26          | F   | 20/01/21                     | 10/02/21          | 0.08 | 0.69 | <20                 | <20                 | 30                           | 10/02/21     | 02/03/21          | 0.94 | 4.25 | 35                  | 20                  | 170            |
| Single-PiCoV-17 | Two-PiCoV-17 | 28          | M   | 21/01/21                     | 11/02/21          | 0.02 | 0.11 | <20                 | <20                 | 20                           | 12/02/21     | 04/03/21          | 0.18 | 0.1  | <20                 | <20                 | 40             |
| Single-PiCoV-18 | Two-PiCoV-18 | 42          | F   | 20/01/21                     | 12/02/21          | 0.03 | 0.25 | <20                 | <20                 | <20                          | 10/02/21     | 04/03/21          | 1.16 | 0.31 | 25                  | 25                  | <20            |
| N/A             | Two-PiCoV-19 | 46          | F   | 19/01/21                     | N/P               | N/P  | N/P  | N/P                 | N/P                 | N/P                          | 09/02/21     | 04/03/21          | 1.77 | 0.34 | <20                 | 20                  | <20            |
| N/A             | Two-PiCoV-20 | 43          | F   | 19/01/21                     | N/P               | N/P  | N/P  | N/P                 | N/P                 | N/P                          | 09/02/21     | 04/03/21          | 0.59 | 0.66 | 20                  | <20                 | 50             |

|     |              |    |   |          |     |     |     |     |     |     |          |          |      |      |     |     |      |
|-----|--------------|----|---|----------|-----|-----|-----|-----|-----|-----|----------|----------|------|------|-----|-----|------|
| N/A | Two-PiCoV-21 | 40 | F | 10/02/21 | N/P | N/P | N/P | N/P | N/P | N/P | 02/03/21 | 24/03/21 | 1.96 | 2.45 | <20 | 25  | 30   |
| N/A | Two-PiCoV-22 | 36 | F | 19/01/21 | N/P | N/P | N/P | N/P | N/P | N/P | 09/02/21 | 04/03/21 | 0.11 | 0.5  | <20 | 160 | <20  |
| N/A | Two-PiCoV-23 | 41 | M | 22/01/21 | N/P | N/P | N/P | N/P | N/P | N/P | 12/02/21 | 04/03/21 | 0.46 | 1.16 | 25  | <20 | <20  |
| N/A | Two-PiCoV-24 | 25 | F | 07/02/21 | N/P | N/P | N/P | N/P | N/P | N/P | 27/02/21 | 25/03/21 | 1    | 6.79 | 25  | <20 | 20   |
| N/A | Two-PiCoV-25 | 42 | M | 23/01/21 | N/P | N/P | N/P | N/P | N/P | N/P | 16/02/21 | 26/03/21 | 0.48 | 0.31 | 50  | 55  | 2560 |
| N/A | Two-PiCoV-26 | 56 | F | 19/01/21 | N/P | N/P | N/P | N/P | N/P | N/P | 09/02/21 | 01/03/21 | 0.71 | 3.99 | 25  | <20 | 20   |
| N/A | Two-PiCoV-27 | 30 | F | 07/02/21 | N/P | N/P | N/P | N/P | N/P | N/P | 27/02/21 | 24/03/21 | 0.47 | 0.2  | <20 | <20 | <20  |
| N/A | Two-PiCoV-28 | 24 | F | 20/01/21 | N/P | N/P | N/P | N/P | N/P | N/P | 10/02/21 | 02/03/21 | 1.91 | 1.53 | 25  | 50  | 960  |
| N/A | Two-PiCoV-29 | 37 | F | 19/01/21 | N/P | N/P | N/P | N/P | N/P | N/P | 09/02/21 | 04/03/21 | 0.85 | 4.02 | 140 | 210 | 960  |
| N/A | Two-PiCoV-30 | 26 | F | 09/02/21 | N/P | N/P | N/P | N/P | N/P | N/P | 02/03/21 | 19/03/21 | 0.78 | 4.09 | 50  | 20  | 120  |
| N/A | Two-PiCoV-31 | 24 | F | 07/02/21 | N/P | N/P | N/P | N/P | N/P | N/P | 27/02/21 | 24/03/21 | 0.37 | 0.41 | 20  | <20 | 680  |
| N/A | Two-PiCoV-32 | 57 | F | 04/02/21 | N/P | N/P | N/P | N/P | N/P | N/P | 03/03/21 | 23/03/21 | 0.88 | 0.21 | <20 | 30  | 800  |
| N/A | Two-PiCoV-33 | 68 | F | 19/01/21 | N/P | N/P | N/P | N/P | N/P | N/P | 09/02/21 | 04/03/21 | 0.44 | 0.08 | <20 | <20 | <20  |
| N/A | Two-PiCoV-34 | 24 | M | 04/02/21 | N/P | N/P | N/P | N/P | N/P | N/P | 26/02/21 | 24/03/21 | 0.32 | 1.09 | <20 | 30  | 640  |
| N/A | Two-PiCoV-35 | 26 | M | 09/02/21 | N/P | N/P | N/P | N/P | N/P | N/P | 01/03/21 | 24/03/21 | 0.64 | 2.69 | <20 | <20 | <20  |
| N/A | Two-PiCoV-36 | 29 | F | 04/02/21 | N/P | N/P | N/P | N/P | N/P | N/P | 24/02/21 | 19/03/21 | 2.17 | 2.17 | 25  | <20 | 120  |
| N/A | Two-PiCoV-37 | 32 | F | 21/01/21 | N/P | N/P | N/P | N/P | N/P | N/P | 12/02/21 | 04/03/21 | 0.31 | 0.37 | <20 | <20 | 680  |
| N/A | Two-PiCoV-38 | 24 | F | 08/02/21 | N/P | N/P | N/P | N/P | N/P | N/P | 28/02/21 | 24/03/21 | 0.33 | 0.78 | <20 | 85  | 1920 |

Legend: N/A, not applicable. N/P, not performed. F, female. M, male. IgM, Immunoglobulin M. IgG, Immunoglobulin G. <sup>1</sup>VNT titer.

**Table S3.** Information and VNT<sub>50</sub> values from CoronaVac vaccinated individuals with two-dose collected 5 months after second-dose.

| ID             | Age (years) | sex | 1° dose  | 2° dose  | Plasma collection | IgM  | IgG  | P.1/ 28 <sup>1</sup> | P.1/30 <sup>1</sup> | B <sup>1</sup> |
|----------------|-------------|-----|----------|----------|-------------------|------|------|----------------------|---------------------|----------------|
| Trial-PiCoV-1  | 59          | F   | 13/08/20 | 28/08/20 | 28/01/21          | 0.29 | 0.33 | <20                  | <20                 | 20             |
| Trial-PiCoV-2  | 40          | F   | 14/08/20 | 28/08/20 | 28/01/21          | 0.26 | 0.06 | <20                  | <20                 | 35             |
| Trial-PiCoV-3  | 29          | M   | 14/08/20 | 28/08/20 | 02/02/21          | 0.06 | 0.38 | <20                  | <20                 | 20             |
| Trial-PiCoV-4  | 38          | M   | 14/08/20 | 28/08/20 | 02/02/21          | 0.06 | 0.08 | <20                  | <20                 | 90             |
| Trial-PiCoV-5  | 34          | M   | 14/08/20 | 28/08/20 | 02/02/21          | 0.15 | 0.36 | <20                  | <20                 | <20            |
| Trial-PiCoV-6  | 36          | F   | 14/08/20 | 28/08/20 | 02/02/21          | 0.12 | 0.16 | <20                  | <20                 | 30             |
| Trial-PiCoV-7  | 32          | M   | 14/08/20 | 28/08/20 | 03/02/21          | 0.87 | 0.31 | <20                  | <20                 | 25             |
| Trial-PiCoV-8  | 34          | F   | 14/08/20 | 28/08/20 | 03/02/21          | 0.43 | 0.29 | <20                  | <20                 | <20            |
| Trial-PiCoV-9  | 35          | F   | 20/08/20 | 03/06/20 | 18/02/21          | 0.10 | 0.31 | <20                  | <20                 | 30             |
| Trial-PiCoV-10 | 31          | F   | 03/09/20 | 18/09/20 | 12/02/21          | 0.14 | 1.09 | <20                  | <20                 | 60             |
| Trial-PiCoV-11 | 28          | F   | 21/08/20 | 04/09/20 | 18/02/21          | 0.08 | 0.25 | <20                  | <20                 | <20            |
| Trial-PiCoV-12 | 34          | M   | 17/09/20 | 30/09/20 | 11/02/21          | 0.04 | 0.07 | <20                  | <20                 | <20            |
| Trial-PiCoV-13 | 42          | F   | 17/08/20 | 31/08/20 | 19/02/21          | 0.12 | 0.13 | <20                  | <20                 | <20            |
| Trial-PiCoV-14 | 39          | F   | 18/08/20 | 27/08/20 | 19/02/21          | 0.04 | 0.85 | <20                  | <20                 | <20            |
| Trial-PiCoV-15 | 32          | F   | 18/08/20 | 27/08/20 | 19/02/21          | 0.31 | 0.09 | <20                  | <20                 | <20            |

Legend: F, female. M, male. IgM, Immunoglobulin M. IgG, Immunoglobulin G. <sup>1</sup>VNT titer.

**Table S4.** Information of genome sequencing of SARS-CoV-2 lineage P.1 used in neutralizing antibody assays.

| <b>Amino acid</b> | <b>Protein</b> | <b>Position</b> | <b>P.1/28*</b> | <b>P.1/30*</b> |
|-------------------|----------------|-----------------|----------------|----------------|
| <i>aa</i>         | <i>orf1ab</i>  | <i>S1188L</i>   | undetermined   | confirmed      |
| <i>aa</i>         | <i>orf1ab</i>  | <i>K1795Q</i>   | confirmed      | confirmed      |
| <i>deletion</i>   | <i>11288</i>   | <i>9 (aa)</i>   | confirmed      | confirmed      |
| <i>aa</i>         | <i>S</i>       | <i>L18F</i>     | confirmed      | confirmed      |
| <i>aa</i>         | <i>S</i>       | <i>T20N</i>     | confirmed      | confirmed      |
| <i>aa</i>         | <i>S</i>       | <i>P26S</i>     | confirmed      | confirmed      |
| <i>aa</i>         | <i>S</i>       | <i>D138Y</i>    | confirmed      | confirmed      |
| <i>aa</i>         | <i>S</i>       | <i>R190S</i>    | undetermined   | confirmed      |
| <i>aa</i>         | <i>S</i>       | <i>K417T</i>    | confirmed      | confirmed      |
| <i>aa</i>         | <i>S</i>       | <i>E484K</i>    | confirmed      | confirmed      |
| <i>aa</i>         | <i>S</i>       | <i>N501Y</i>    | confirmed      | confirmed      |
| <i>aa</i>         | <i>S</i>       | <i>H655Y</i>    | confirmed      | confirmed      |
| <i>aa</i>         | <i>S</i>       | <i>T1027I</i>   | confirmed      | confirmed      |
| <i>aa</i>         | <i>orf3a</i>   | <i>G174C</i>    | absence        | absence        |
| <i>aa</i>         | <i>orf8</i>    | <i>E92K</i>     | confirmed      | confirmed      |
| <i>aa</i>         | <i>N</i>       | <i>P80R</i>     | confirmed      | confirmed      |
| <i>aa</i>         | <i>S</i>       | <i>D614G</i>    | confirmed      | confirmed      |
| <i>aa</i>         | <i>S</i>       | <i>V1176F</i>   | confirmed      | confirmed      |
| <i>aa</i>         | <i>orf3a</i>   | <i>S253P</i>    | confirmed      | confirmed      |
| <i>aa</i>         | <i>N</i>       | <i>R203K</i>    | confirmed      | confirmed      |
| <i>aa</i>         | <i>N</i>       | <i>G204R</i>    | confirmed      | confirmed      |
| <i>aa</i>         | <i>N</i>       | <i>S250P</i>    | confirmed      | absence        |
| <i>aa</i>         | nsp3           | <i>S370L</i>    | undetermined   | confirmed      |
| <i>aa</i>         | nsp3           | <i>K977Q</i>    | confirmed      | confirmed      |
| <i>aa</i>         | nsp3           | <i>S1735F</i>   | absence        | confirmed      |
| <i>aa</i>         | nsp6           | <i>L260F</i>    | absence        | confirmed      |
| <i>aa</i>         | nsp12          | <i>P323L</i>    | confirmed      | confirmed      |
| <i>aa</i>         | nsp13          | <i>E341D</i>    | confirmed      | confirmed      |

Legend: \* sequences are available on GISAID (accession number: EPI\_ISL\_1708317 and EPI\_ISL\_1708318; <https://www.gisaid.org>). The coding regions are those annotated on Wuhan-Hu-1 (GenBank accession number: NC\_045512).

**Table S5.** Count tables of paired differences.

| <b>Groups</b>                         | <b>Isolates paired</b> | <b>less or equal to 0 ("<math>\leq 0</math>")</b> | <b>greater than 0 ("<math>&gt; 0</math>")</b> |
|---------------------------------------|------------------------|---------------------------------------------------|-----------------------------------------------|
| COVID-19-convalescent blood-donors    | B and P.1/28           | 1                                                 | 20                                            |
|                                       | B and P.1/30           | 1                                                 | 20                                            |
| Single-dose CoronaVac (~3 week after) | B and P.1/28           | 5                                                 | 13                                            |
|                                       | B and P.1/30           | 4                                                 | 14                                            |
| Two-doses CoronaVac (~3 week after)   | B and P.1/28           | 12                                                | 26                                            |
|                                       | B and P.1/30           | 10                                                | 28                                            |
| Two-doses CoronaVac (~5 months after) | B and P.1/28           | 7                                                 | 8                                             |
|                                       | B and P.1/30           | 7                                                 | 8                                             |
